# Supplementary material
Source: PubMed Central journal article supplement (PMC8687628)
Supplement: NIHMS1737943-supplement-1.pdf [file NIHMS1737943-supplement-1.pdf]

## **Supplementary Tables and Figures**

### **Functional Characterization of Brain Tumor-Initiating Cells and Establishment of GBM Preclinical Models that Incorporate Heterogeneity, Therapy, and Sex Differences**

Cesar A. Garcia<sup>1,2</sup>, Adip G. Bhargav<sup>1,2,3</sup>, Mieu Brooks<sup>1,2</sup>, Paola Suarez-Meade<sup>1,2</sup>, Sujan K. Mondal<sup>1,2</sup>, Natanael Zarco<sup>1,4</sup>, Karim ReFaey<sup>1</sup>, Mark Jentoft<sup>5</sup>, Erik H. Middlebrooks<sup>1,6</sup>, Matija Snuderl<sup>7</sup>, Anna Carrano<sup>1,4</sup>, Hugo Guerrero-Cazares<sup>1,4</sup>, Paula Schiapparelli<sup>1,2</sup>, Rachel Sarabia-Estrada<sup>1,2</sup>, Alfredo Quiñones-Hinojosa<sup>1,2</sup>

<sup>1</sup>Department of Neurosurgery, Mayo Clinic, Jacksonville, FL, USA

<sup>2</sup>Brain Tumor Stem Cell Laboratory, Mayo Clinic, Jacksonville, FL, USA

<sup>3</sup>Mayo Clinic Alix School of Medicine, Mayo Clinic, Rochester, MN, USA

<sup>4</sup>Neurogenesis and Brain Tumors Laboratory, Mayo Clinic, Jacksonville, FL, USA

<sup>5</sup>Department of Pathology, Mayo Clinic, Jacksonville, FL, USA

<sup>6</sup>Department of Radiology, Mayo Clinic, Jacksonville, FL, USA

<sup>7</sup>Department of Pathology, NYU Langone Health, New York, NY, USA

#### **Corresponding Author**

Alfredo Quiñones-Hinojosa, MD, FAANS, FACS

William J. and Charles H. Mayo Professor, Chair

Neurologic Surgery

Mayo Clinic

4500 San Pablo Rd.

Jacksonville, FL 32224, USA

Phone: (904)-956-3435

Email: [Quinones-Hinojosa.Alfredo@mayo.edu](mailto:Quinones-Hinojosa.Alfredo@mayo.edu)

# Functional Characterization of GBM BTIC Heterogeneity

Garcia et al.

## Table S1. Material List

| Material                                                                                                    | Manufacturer                 | Catalogue Number |
|-------------------------------------------------------------------------------------------------------------|------------------------------|------------------|
| Leica low profile blades 819                                                                                | Leica                        | 14035838925      |
| Tissue-Tek® O.C.T. Compound                                                                                 | Sakura                       | 4583             |
| Polyclonal Rabbit Anti-Glial Fibrillary Acidic Protein                                                      | Dako                         | Z0334            |
| Purified anti-Tubulin β3 (TUB3) Clone: TUJ1                                                                 | BioLegend                    | 801201           |
| MS x Nestin, clone 10C2 Human Specific                                                                      | EMD Millipore                | MAB5326          |
| Goat Serum                                                                                                  | Sigma                        | G9023-10ml       |
| Alexa Fluor® 488 goat anti-mouse IgG                                                                        | Invitrogen                   | A11001           |
| Alexa Fluor® 594 goat anti-rabbit IgG                                                                       | Invitrogen                   | A11012           |
| Isoflurane, USP                                                                                             | Piramal Critical Care        | NDC 66794-017-25 |
| PBS, 1x                                                                                                     | Corning Cellgro              | 21-040-CV        |
| Fisherbrand Microscope Cover Glass                                                                          | Fisher Scientific            | 12-545-J         |
| Round Glass Cover Slip, German Glass, Size: 15mm diameter                                                   | Electron Microscopy Sciences | 72196            |
| Poly-L-ornithine solution                                                                                   | Sigma                        | P49757-50ml      |
| Gem21 NeuroPlex™ Serum-Free, w/o Vitamin A                                                                  | Gemini Bio-Products          | 400-161          |
| Human EGF                                                                                                   | PeptoTech, INC.              | AF-100-15-1MG    |
| Human FGF-Basic                                                                                             | PeptoTech, INC.              | AF-100-18B-1MG   |
| DMSO                                                                                                        | Sigma                        | D1435-500ml      |
| Formaldehyde (Methanol Free), 10% UltraPure EM Grade                                                        | Polysciences, Inc.           | 04018-1          |
| Ethylene Glycol                                                                                             | EMSURE®                      | 1.09621.1000     |
| DAPI                                                                                                        | Thermo Scientific            | 62248            |
| Cell Culture Plate, 96 well                                                                                 | costar®                      | 3595             |
| Accutase                                                                                                    | Sigma                        | A6964-500        |
| 6.5mm Transwell® with 8.0 µm Pore Polycarbonate Membrane Insert, Sterile                                    | Corning Costar®              | 3422             |
| Nunc Non-treated T25 Easyflask, Filter cap (white)                                                          | Thermo Scientific            | 169900           |
| Nunc Cell Culture treated T25 EasyFlask, Filter cap (blue)                                                  | Thermo Scientific            | 156367           |
| Nunc Non-treated T75 Easyflask, Filter cap (white)                                                          | Thermo Scientific            | 156800           |
| Nunc Cell Culture treated T75 EasyFlask, Filter cap (blue)                                                  | Thermo Scientific            | 156499           |
| Cultrex Mouse Laminin I                                                                                     | Fisher Scientific            | 3400-010-01      |
| CD133/1 antibody                                                                                            | Miltenyi Biotec              | 130-098-829      |
| Isotype Control Antibody, Mouse IgG1 PE                                                                     | Miltenyi Biotec              | 130-113-200      |
| HEK293 cells                                                                                                | ATCC®                        | CRL-3216™        |
| CyQUANT™ Cell Proliferation Assay Kit, for cells in culture                                                 | Invitrogen                   | C7026            |
| Temozolomide                                                                                                | Selleckchem                  | S1237            |
| Recombinant human TRAIL protein                                                                             | Abcam                        | ab168898         |
| Recombinant human BMP4-4                                                                                    | PeptoTech                    | 120-05ET         |
| Hamilton Syringes 10µl Model 1701 NSYR, Cemented NDL, 26ga, 2 in, point style 3                             | Hamilton                     | 80085            |
| Lipofectamine 3000                                                                                          | Thermo Fisher                | L3000015         |
| D-Luciferin, Potassium Salt                                                                                 | Gold Biotechnology           | LUCK-5G          |
| psPAX2, pMD.2, and the plasmid pHAGE PGK-GFP-IRES-LUC-W                                                     | Addgene                      | 46793            |
| Lenti-X™ p24 Rapid Titer Kit                                                                                | Takara                       | 632200           |
| TC plate 6 well standard F                                                                                  | sarstedt                     | 83.3920.         |
| Lenti-X Concentrator reagent                                                                                | Clontech                     | 631231           |
| Target2™ PES (Polyethersulfone) Syringe Filters 0.45µm                                                      | ThermoFisher Scientific      | F2500-14         |
| Pump 11 Elite                                                                                               | Harvard Apparatus            | 70-4507          |
| Homeothermic Monitoring System                                                                              | Harvard Apparatus            | 55-7020          |
| Olympus SZ2-STB2 surgical scope                                                                             | Olympus                      | 4H05300          |
| 1 mm Bone Drill                                                                                             | Ideal Micro-Drill            | 67-1000 (3052)   |
| Cell Strainer 40 µm nylon mesh                                                                              | Fisherbrand®                 | 22363547         |
| 500 ml Vacuum Filter/Storage Bottle System, 0.22µm Pore 33.2 cm <sup>2</sup> PES Membrane, sterile, 12/Case | Corning                      | 431097           |
| Corning Costar® TC-Treated Multiple Well Plates                                                             | Corning Costar®              | 3526             |
| Diamond™ White Glass Microscope Slides                                                                      | Globe Scientific INC.        | 1380-30          |
| psPAX2                                                                                                      | Addgene                      | 12260            |
| pMD.2                                                                                                       | Addgene                      | 12259            |
| p24 ELISA Kit                                                                                               | Takara Bio                   | 632200           |
| Qiagen Dneasy® Blood & Tissue Kit (50)                                                                      | Qiagen                       | 69504            |
| Anti-IDH1 R132H/DIA-H09-RUO                                                                                 | dianova                      | DIA-H09-RUO      |
| Novacastra™ Liquid Mouse Monoclonal Antibody p53 Protein (DO-7)                                             | Leica                        | NCL-L-p53-DO7    |
| ATRX (D-5)                                                                                                  | SANTA CRUZ BIOTECHNOLOGY, I  | sc-55584         |
| Anti-Nuclei Antibody, clone 3E1.3 (Human Nuclei)                                                            | Millipore Sigma              | MAB4383          |
| Anti-Ki-67 Antibody, clone Ki-S5                                                                            | Millipore Sigma              | MAB4190          |

**Table S2. Equipment and Software**

| <b>Equipment/Software</b>                                                                 |
|-------------------------------------------------------------------------------------------|
| The X-RAD SmART© irradiator                                                               |
| Zeiss LSM 800 Confocal System Based on Axio Observer for Z1 Motorized Inverted Microscope |
| Arivis Vision4D x64 3.0                                                                   |
| Synergy HTX multi-mode reader                                                             |
| Zen 2.3 System                                                                            |
| Zeiss Confocal Microscope (Observer Z, LSM 800, X-Cite 120 LED Boost)                     |
| Vi-Cell™ XR Cell Viability Analyzer                                                       |
| Leica CM1950 Cryostat                                                                     |
| Leica Aperio AT2                                                                          |
| IVIS® Spectrum XENGEN                                                                     |

**Figure S1: Cell Line STR Fragment Authentication Report from IDEXX**

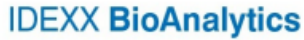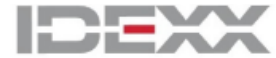

**FINAL REPORT OF LABORATORY EXAMINATION**  
 4011 Discovery Drive, Columbia, MO 65201  
 1-800-669-0825 1-573-499-5700  
[Idexxbioanalytics@idexx.com](mailto:Idexxbioanalytics@idexx.com) [www.idexxbioanalytics.com](http://www.idexxbioanalytics.com)

**IDEXX BioAnalytics Case # 35416-2019**

**Received: 12/17/2019**  
**Completed: 12/19/2019**

**Submitted By**

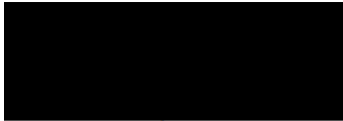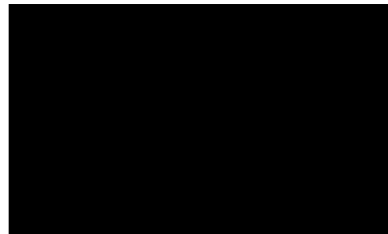

**Specimen Description**

Species: human  
 Description: Cells  
 Number of Specimens/Animals: 15

| ID | Client ID           | Acq ID     | Investigator          | Cell Line | Species | Sex |
|----|---------------------|------------|-----------------------|-----------|---------|-----|
| 1  | 1A Vescovi clean CG | 11/20/2019 | Dr. Quinones-Hinojosa | GBM 1A    | human   | M   |
| 2  | QNS108 p6 wt        | 9/28/2019  | Dr. Quinones-Hinojosa | QNS108    | human   |     |
| 3  | QNS120 p10 wt       | 9/25/2019  | Dr. Quinones-Hinojosa | QNS120    | human   |     |
| 4  | QNS140 p11 wt       | 11/6/2019  | Dr. Quinones-Hinojosa | QNS140    | human   |     |
| 5  | QNS166 p8 wt        | 7/25/2019  | Dr. Quinones-Hinojosa | QNS166    | human   |     |
| 6  | QNS166 p10 wt       | 9/25/2019  | Dr. Quinones-Hinojosa | QNS166    | human   |     |
| 7  | QNS203 p8 wt        | 6/4/2019   | Dr. Quinones-Hinojosa | QNS203    | human   |     |
| 8  | QNS203 p8 gfp box1  | 9/30/2019  | Dr. Quinones-Hinojosa | QNS203    | human   |     |
| 9  | QNS203 p8 gfp box2  | 9/30/2019  | Dr. Quinones-Hinojosa | QNS203    | human   |     |
| 10 | QNS203 p8 gfp ML    | 9/30/2019  | Dr. Quinones-Hinojosa | QNS203    | human   |     |
| 11 | QNS259 p6 wt        | 9/30/2019  | Dr. Quinones-Hinojosa | QNS259    | human   |     |
| 12 | QNS263 p5 wt        | 9/30/2019  | Dr. Quinones-Hinojosa | QNS263    | human   |     |
| 13 | QNS315 p6 wt        | 9/30/2019  | Dr. Quinones-Hinojosa | QNS315    | human   |     |

If you have questions, please call our toll free number at 1-800-669-0825 or e-mail us at [IdexxBioAnalytics@idexx.com](mailto:IdexxBioAnalytics@idexx.com).

Functional Characterization of GBM BTIC Heterogeneity  
Garcia et al.

| ID | Client ID    | Add ID    | Investigator          | Cell Line | Species | Sex |
|----|--------------|-----------|-----------------------|-----------|---------|-----|
| 14 | QNS318 p5 wt | 9/30/2019 | Dr. Quinones-Hinojosa | QNS318    | human   |     |
| 15 | QNS322 p5 wt | 9/30/2019 | Dr. Quinones-Hinojosa | QNS322    | human   |     |

**Services/Tests Performed:** CellCheck 9 - human (9 Marker STR Profile and Inter-species Contamination Test) (1-15)

**Genetic evaluation for:** Human 9-Marker STR Profile, Interspecies Contamination Test

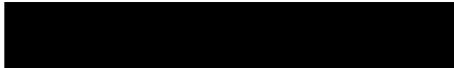

**Summary:** Cell Check results are provided in the data results section for each sample. For human samples, an identity matching score above 80% indicates the sample is consistent with the cell line of origin. For human samples with less than an 80% matching score, please see individual comments for these samples in the detail section.

Please see the report for details.

Functional Characterization of GBM BTIC Heterogeneity  
 Garcia et al.

**CELL CHECK**

**Species-specific PCR Evaluation**

| Species              | 1 | 2 | 3 | 4 | 5 | 6 | 7 | 8 | 9 | 10 |
|----------------------|---|---|---|---|---|---|---|---|---|----|
| mouse                | - | - | - | - | - | - | - | - | - | -  |
| rat                  | - | - | - | - | - | - | - | - | - | -  |
| human                | + | + | + | + | + | + | + | + | + | +  |
| Chinese hamster      | - | - | - | - | - | - | - | - | - | -  |
| African green monkey | - | - | - | - | - | - | - | - | - | -  |

| Species              | 11 | 12 | 13 | 14 | 15 |
|----------------------|----|----|----|----|----|
| mouse                | -  | -  | -  | -  | -  |
| rat                  | -  | -  | -  | -  | -  |
| human                | +  | +  | +  | +  | +  |
| Chinese hamster      | -  | -  | -  | -  | -  |
| African green monkey | -  | -  | -  | -  | -  |

**Marker Analysis**

| Marker Name    | 1                 |        | 2                 |         | 3                 |         | 4                 |         | 5                 |         | 6              |                           |
|----------------|-------------------|--------|-------------------|---------|-------------------|---------|-------------------|---------|-------------------|---------|----------------|---------------------------|
|                | Sample Results    | GMB 1A | Sample Results    | QNS 108 | Sample Results    | QNS 120 | Sample Results    | QNS 140 | Sample Results    | QNS 166 | Sample Results | QNS 166 (IBA# 35416-19-5) |
| AMEL           | X, Y              | NA     | X, Y              | NA      | X, Y              | NA      | X, Y              | NA      | X                 | NA      | X              | X                         |
| CSF1PO         | 11, 12            | NA     | 11, 12            | NA      | 11, 12            | NA      | 11, 13            | NA      | 12                | NA      | 12             | 12                        |
| D13S317        | 8, 11             | NA     | 11, 12            | NA      | 10, 12            | NA      | 8                 | NA      | 8, 9              | NA      | 8, 9           | 8, 9                      |
| D16S539        | 8, 13             | NA     | 11, 12            | NA      | 12, 13            | NA      | 9, 10             | NA      | 12                | NA      | 12             | 12                        |
| D5S818         | 10, 11            | NA     | 11                | NA      | 9, 13             | NA      | 11, 12            | NA      | 12, 13            | NA      | 12, 13         | 12, 13                    |
| D7S820         | 10                | NA     | 9, 10             | NA      | 11, 12            | NA      | 9, 10             | NA      | 10, 11            | NA      | 10, 11         | 10, 11                    |
| TH01           | 6, 7              | NA     | 6, 8              | NA      | 6, 9              | NA      | 9.3               | NA      | 6                 | NA      | 6              | 6                         |
| TPOX           | 8                 | NA     | 9, 12             | NA      | 8, 9              | NA      | 9, 12             | NA      | 8, 11             | NA      | 8, 11          | 8, 11                     |
| vWA            | 16, 17            | NA     | 15, 16            | NA      | 14, 20            | NA      | 15, 17            | NA      | 16, 17            | NA      | 16, 17         | 16, 17                    |
| Identity Match | N/A, see comments |        | N/A, see comments |         | N/A, see comments |         | N/A, see comments |         | N/A, see comments |         | 100%           |                           |

| Marker Name | 7              |         | 8              |                           | 9              |                           | 10             |                           | 11             |         | 12             |         |
|-------------|----------------|---------|----------------|---------------------------|----------------|---------------------------|----------------|---------------------------|----------------|---------|----------------|---------|
|             | Sample Results | QNS 203 | Sample Results | QNS 203 (IBA# 35416-19-7) | Sample Results | QNS 203 (IBA# 35416-19-7) | Sample Results | QNS 203 (IBA# 35416-19-7) | Sample Results | QNS 259 | Sample Results | QNS 263 |
| AMEL        | X, Y           | NA      | X, Y           | X, Y                      | X, Y           | X, Y                      | X, Y           | X, Y                      | X, Y           | NA      | X, Y           | NA      |
| CSF1PO      | 11, 12         | NA      | 11, 12         | 11, 12                    | 11, 12         | 11, 12                    | 11, 12         | 11, 12                    | 11, 12         | NA      | 10, 12         | NA      |
| D13S317     | 8, 11          | NA      | 8, 11          | 8, 11                     | 8, 11          | 8, 11                     | 8, 11          | 8, 11                     | 12             | NA      | 8, 11          | NA      |
| D16S539     | 8, 13          | NA      | 8, 13          | 8, 13                     | 8, 13          | 8, 13                     | 8, 13          | 8, 13                     | 10, 11         | NA      | 9, 11          | NA      |
| D5S818      | 10, 11         | NA      | 10, 11         | 10, 11                    | 10, 11         | 10, 11                    | 10, 11         | 10, 11                    | 12             | NA      | 11, 13         | NA      |

# Functional Characterization of GBM BTIC Heterogeneity

Garcia et al.

| Marker Name    | 7                 |         | 8              |                           | 9              |                           | 10             |                           | 11                |         | 12                |         |
|----------------|-------------------|---------|----------------|---------------------------|----------------|---------------------------|----------------|---------------------------|-------------------|---------|-------------------|---------|
|                | Sample Results    | QNS 203 | Sample Results | QNS 203 (IBA# 35416-19-7) | Sample Results | QNS 203 (IBA# 35416-19-7) | Sample Results | QNS 203 (IBA# 35416-19-7) | Sample Results    | QNS 259 | Sample Results    | QNS 263 |
| D7S820         | 10                | NA      | 10             | 10                        | 10             | 10                        | 10             | 10                        | 11, 13            | NA      | 9                 | NA      |
| TH01           | 6, 7              | NA      | 6, 7           | 6, 7                      | 6, 7           | 6, 7                      | 6, 7           | 6, 7                      | 7, 9,3            | NA      | 6, 7              | NA      |
| TPOX           | 8                 | NA      | 8              | 8                         | 8              | 8                         | 8              | 8                         | 8, 12             | NA      | 8, 9              | NA      |
| vWA            | 16, 17            | NA      | 16, 17         | 16, 17                    | 16, 17         | 16, 17                    | 16, 17         | 16, 17                    | 16, 17            | NA      | 17, 18            | NA      |
| Identity Match | N/A, see comments |         | 100%           |                           | 100%           |                           | 100%           |                           | N/A, see comments |         | N/A, see comments |         |

| Marker Name    | 13                |         | 14                |         | 15                |         |
|----------------|-------------------|---------|-------------------|---------|-------------------|---------|
|                | Sample Results    | QNS 315 | Sample Results    | QNS 318 | Sample Results    | QNS 322 |
| AMEL           | X                 | NA      | X                 | NA      | X                 | NA      |
| CSF1PO         | 11, 13            | NA      | 8, 10             | NA      | 10                | NA      |
| D13S317        | 14                | NA      | 11, 12            | NA      | 10, 12            | NA      |
| D16S539        | 9, 11             | NA      | 9, 13             | NA      | 11                | NA      |
| D5S818         | 11, 12            | NA      | 11                | NA      | 11, 12            | NA      |
| D7S820         | 11                | NA      | 9, 11             | NA      | 8, 11             | NA      |
| TH01           | 9                 | NA      | 9                 | NA      | 7, 9              | NA      |
| TPOX           | 11                | NA      | 9, 11             | NA      | 8                 | NA      |
| vWA            | 14, 19            | NA      | 17, 18            | NA      | 14, 16            | NA      |
| Identity Match | N/A, see comments |         | N/A, see comments |         | N/A, see comments |         |

| Sample ID | Remarks                                                                                                                                                                                                                                                                                                                                                                                                                                                                                                                                                                                                                                                                                                             |
|-----------|---------------------------------------------------------------------------------------------------------------------------------------------------------------------------------------------------------------------------------------------------------------------------------------------------------------------------------------------------------------------------------------------------------------------------------------------------------------------------------------------------------------------------------------------------------------------------------------------------------------------------------------------------------------------------------------------------------------------|
| 1         | NA in the table indicates profile data is not available for comparison purposes for this sample. The genetic profile for the sample was compared to the cell line genetic profiles available in the DSMZ STR database and did not match any other reported profiles in the DSMZ database. Without a sample representing the original source material the sample was derived from, it is not possible to make any interpretations in terms of authentication of the cell line other than it has a unique profile not found in the current public databases. The genetic profile established for this sample should be published in subsequent manuscripts and can be used for future comparisons for this cell line. |
| 2         | NA in the table indicates profile data is not available for comparison purposes for this sample. The genetic profile for the sample was compared to the cell line genetic profiles available in the DSMZ STR database and did not match any other reported profiles in the DSMZ database. Without a sample representing the original source material the sample was derived from, it is not possible to make any interpretations in terms of authentication of the cell line other than it has a unique profile not found in the current public databases. The genetic profile established for this sample should be published in subsequent manuscripts and can be used for future comparisons for this cell line. |
| 3         | NA in the table indicates profile data is not available for comparison purposes for this sample. The genetic profile for the sample was compared to the cell line genetic profiles available in the DSMZ STR database and did not match any other reported profiles in the DSMZ database. Without a sample representing the original source material the sample was derived from, it is not possible to make any interpretations in terms of authentication of the cell line other than it has a unique profile not found in the current public databases. The genetic profile established for this sample should be published in subsequent manuscripts and can be used for future comparisons for this cell line. |

# Functional Characterization of GBM BTIC Heterogeneity

Garcia et al.

| Sample ID | Remarks                                                                                                                                                                                                                                                                                                                                                                                                                                                                                                                                                                                                                                                                                                             |
|-----------|---------------------------------------------------------------------------------------------------------------------------------------------------------------------------------------------------------------------------------------------------------------------------------------------------------------------------------------------------------------------------------------------------------------------------------------------------------------------------------------------------------------------------------------------------------------------------------------------------------------------------------------------------------------------------------------------------------------------|
| 4         | NA in the table indicates profile data is not available for comparison purposes for this sample. The genetic profile for the sample was compared to the cell line genetic profiles available in the DSMZ STR database and did not match any other reported profiles in the DSMZ database. Without a sample representing the original source material the sample was derived from, it is not possible to make any interpretations in terms of authentication of the cell line other than it has a unique profile not found in the current public databases. The genetic profile established for this sample should be published in subsequent manuscripts and can be used for future comparisons for this cell line. |
| 5         | NA in the table indicates profile data is not available for comparison purposes for this sample. The genetic profile for the sample was compared to the cell line genetic profiles available in the DSMZ STR database and did not match any other reported profiles in the DSMZ database. Without a sample representing the original source material the sample was derived from, it is not possible to make any interpretations in terms of authentication of the cell line other than it has a unique profile not found in the current public databases. The genetic profile established for this sample should be published in subsequent manuscripts and can be used for future comparisons for this cell line. |
| 7         | NA in the table indicates profile data is not available for comparison purposes for this sample. The genetic profile for the sample was compared to the cell line genetic profiles available in the DSMZ STR database and did not match any other reported profiles in the DSMZ database. Without a sample representing the original source material the sample was derived from, it is not possible to make any interpretations in terms of authentication of the cell line other than it has a unique profile not found in the current public databases. The genetic profile established for this sample should be published in subsequent manuscripts and can be used for future comparisons for this cell line. |
| 11        | NA in the table indicates profile data is not available for comparison purposes for this sample. The genetic profile for the sample was compared to the cell line genetic profiles available in the DSMZ STR database and did not match any other reported profiles in the DSMZ database. Without a sample representing the original source material the sample was derived from, it is not possible to make any interpretations in terms of authentication of the cell line other than it has a unique profile not found in the current public databases. The genetic profile established for this sample should be published in subsequent manuscripts and can be used for future comparisons for this cell line. |
| 12        | NA in the table indicates profile data is not available for comparison purposes for this sample. The genetic profile for the sample was compared to the cell line genetic profiles available in the DSMZ STR database and did not match any other reported profiles in the DSMZ database. Without a sample representing the original source material the sample was derived from, it is not possible to make any interpretations in terms of authentication of the cell line other than it has a unique profile not found in the current public databases. The genetic profile established for this sample should be published in subsequent manuscripts and can be used for future comparisons for this cell line. |
| 13        | NA in the table indicates profile data is not available for comparison purposes for this sample. The genetic profile for the sample was compared to the cell line genetic profiles available in the DSMZ STR database and did not match any other reported profiles in the DSMZ database. Without a sample representing the original source material the sample was derived from, it is not possible to make any interpretations in terms of authentication of the cell line other than it has a unique profile not found in the current public databases. The genetic profile established for this sample should be published in subsequent manuscripts and can be used for future comparisons for this cell line. |
| 14        | NA in the table indicates profile data is not available for comparison purposes for this sample. The genetic profile for the sample was compared to the cell line genetic profiles available in the DSMZ STR database and did not match any other reported profiles in the DSMZ database. Without a sample representing the original source material the sample was derived from, it is not possible to make any interpretations in terms of authentication of the cell line other than it has a unique profile not found in the current public databases. The genetic profile established for this sample should be published in subsequent manuscripts and can be used for future comparisons for this cell line. |
| 15        | NA in the table indicates profile data is not available for comparison purposes for this sample. The genetic profile for the sample was compared to the cell line genetic profiles available in the DSMZ STR database and did not match any other reported profiles in the DSMZ database. Without a sample representing the original source material the sample was derived from, it is not possible to make any interpretations in terms of authentication of the cell line other than it has a unique profile not found in the current public databases. The genetic profile established for this sample should be published in subsequent manuscripts and can be used for future comparisons for this cell line. |

**Figure S1.** Cell line authentication was conducted with IDEXX BioAnalytics by performing Short Tandem Repeat (STR) Fragment analysis where GBM cell lines BTIC lines were compared to the DSMZ STR database. A collection of other cell lines stored in our laboratory’s bank were included in the analysis and compared to our primary GBM cell lines. GBM cell lines were unique, human-derived, and matched the sex of the original patient donors.



**Table S3. Patient Characteristics**

| Characteristics                       | QNS108♂               | QNS120♂               | QNS140♂        | QNS166♀                | QNS315♀        | QNS509♀ |
|---------------------------------------|-----------------------|-----------------------|----------------|------------------------|----------------|---------|
| <b>Demographics</b>                   |                       |                       |                |                        |                |         |
| Age at Diagnosis                      | 63 yo                 | 59 yo                 | 64 yo          | 59 yo                  | 63 yo          | 75 yo   |
| Sex                                   | Male                  | Male                  | Male           | Female                 | Female         | Female  |
| Diagnosis*                            | GBM                   | GBM                   | GBM            | GBM                    | GBM            | GBM     |
| <b>Tumor Location</b>                 |                       |                       |                |                        |                |         |
| Lobe                                  | Left parieto-temporal | Left parieto-temporal | Right temporal | Left inferior parietal | Right temporal | Right   |
| Proximal or Distal (P/D) to Ventricle | P                     | P                     | P              | P                      | P              | P       |
| <b>Molecular Markers</b>              |                       |                       |                |                        |                |         |
| IDH Mutant                            | -                     | -                     | -              | -                      | -              | -       |
| MGMT Methylation                      | -                     | +                     | +              | -                      | +              | -       |
| ATRX nuclear expression               | +                     | +                     | +              | +                      | +              | +       |
| p53 intact                            | +                     | +                     | +              | +                      | +              | +       |

Abbreviations: yo= years old, GBM=glioblastoma, IDH= Isocitrate Dehydrogenase, MGMT=O6-methylguanine DNA Methyltransferase

\*Diagnosis based on World Health Organization criteria, P= proximal, D= distal

**Table S4. Epigenetic Classification**

| Cell Line        | Epigenetic CNS Tumor Classification (*Calibrated score) | GBM Subclass (*Calibrated score, TCGA classification)      | MGMT Methylation Status |
|------------------|---------------------------------------------------------|------------------------------------------------------------|-------------------------|
| <b>QNS 108</b> ♂ | GBM IDH-WT (0.99)                                       | RTK II (0.87, Classical) + RTK I (0.1, Proneural)          | unmethylated            |
| <b>QNS 120</b> ♂ | GBM IDH-WT (0.98)                                       | RTK II (0.75, Classical) + Mesenchymal (0.16, Mesenchymal) | methylated              |
| <b>QNS 140</b> ♂ | GBM IDH-WT (0.93)                                       | RTK II (0.67, Classical) + RTK I (0.24, Proneural)         | methylated              |
| <b>QNS 166</b> ♀ | GBM IDH-WT (0.96)                                       | RTK II (0.82, Classical) + RTK I (0.11, Proneural)         | methylated              |
| <b>QNS 315</b> ♀ | GBM IDH-WT (0.98)                                       | RTK II (0.91, Classical) + Mesenchymal (0.05, Mesenchymal) | methylated              |
| <b>QNS 509</b> ♀ | GBM IDH-WT (0.98)                                       | RTK II (0.74, Classical) + RTK I (0.14, Proneural)         | methylated              |

\*Calibrated score designation based on subtyping analysis. CNS tumor match  $\geq 0.9$  and subclass match  $\geq 0.5$ .

Figure S2: Copy Number Variation (CNV) Profiles

# QNS108

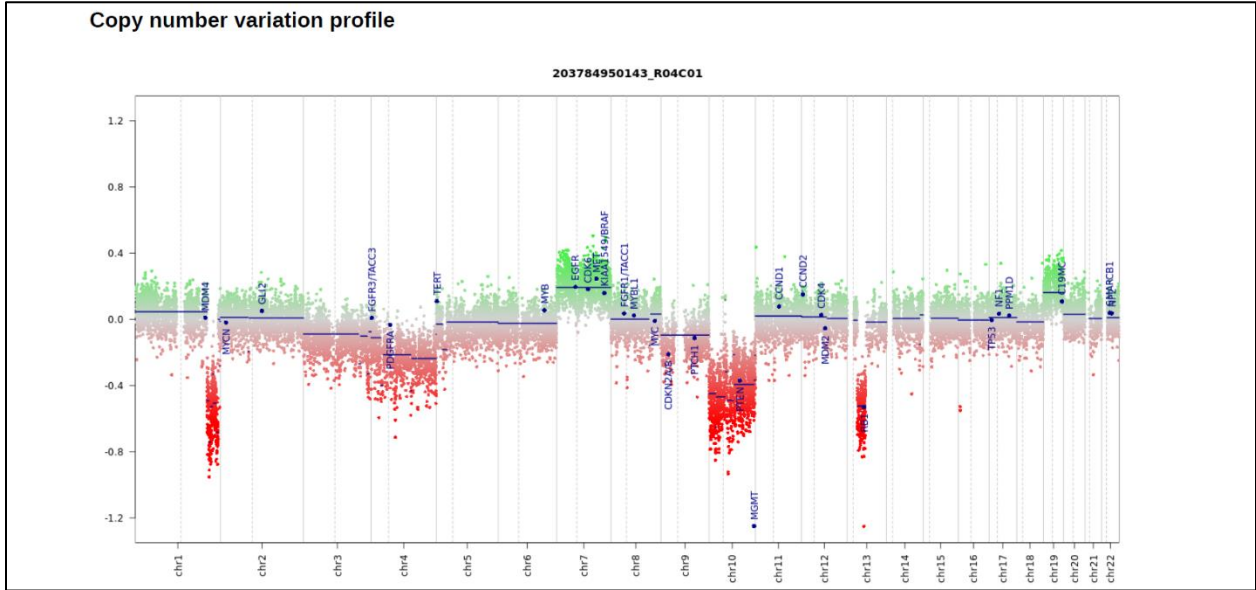

# QNS120

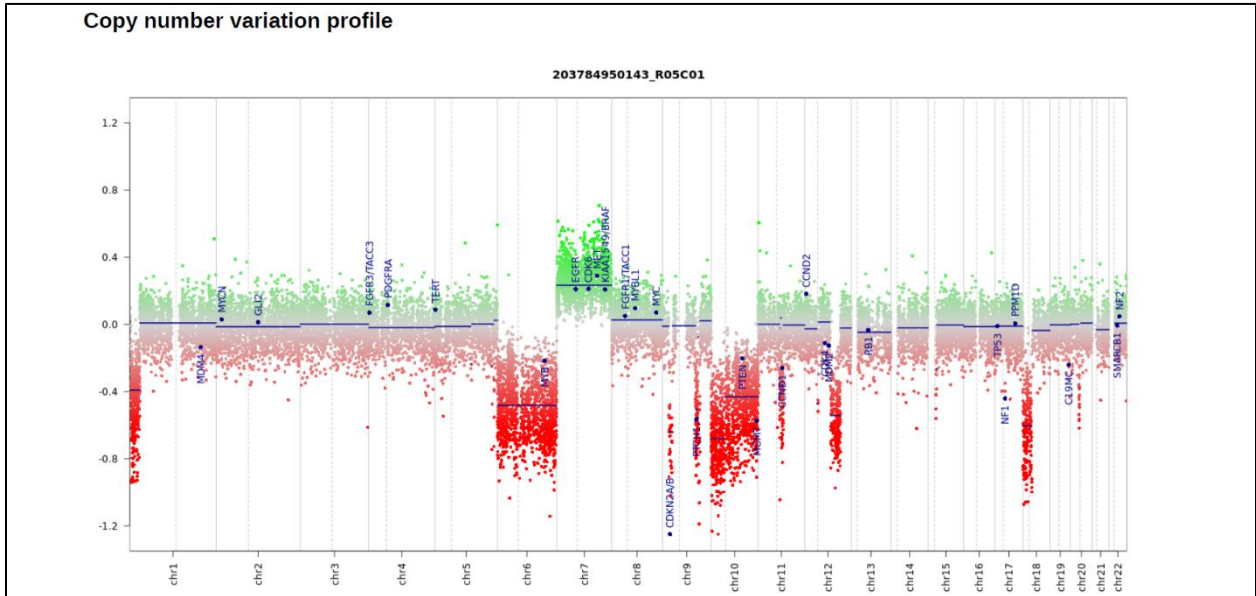

# QNS140

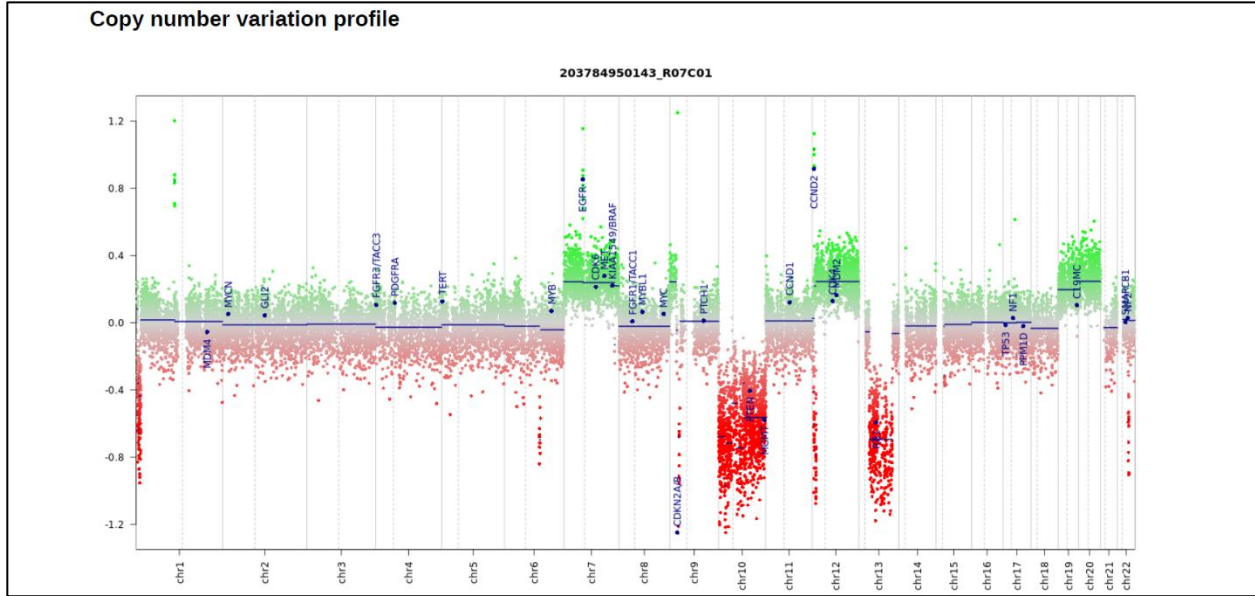

# QNS166

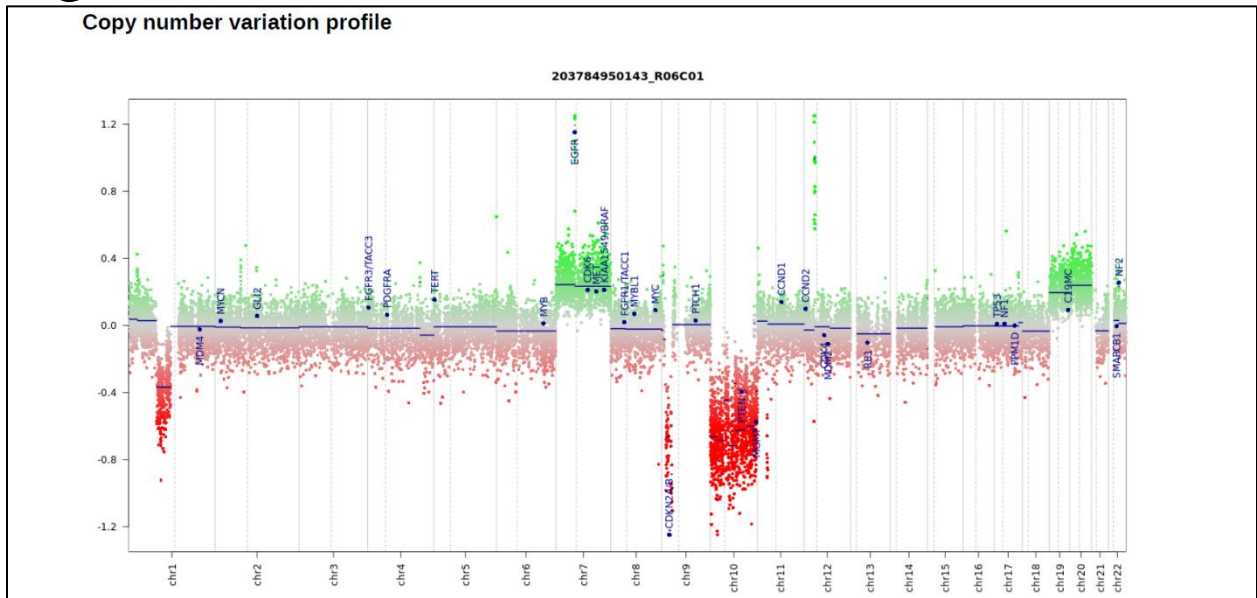

# QNS315

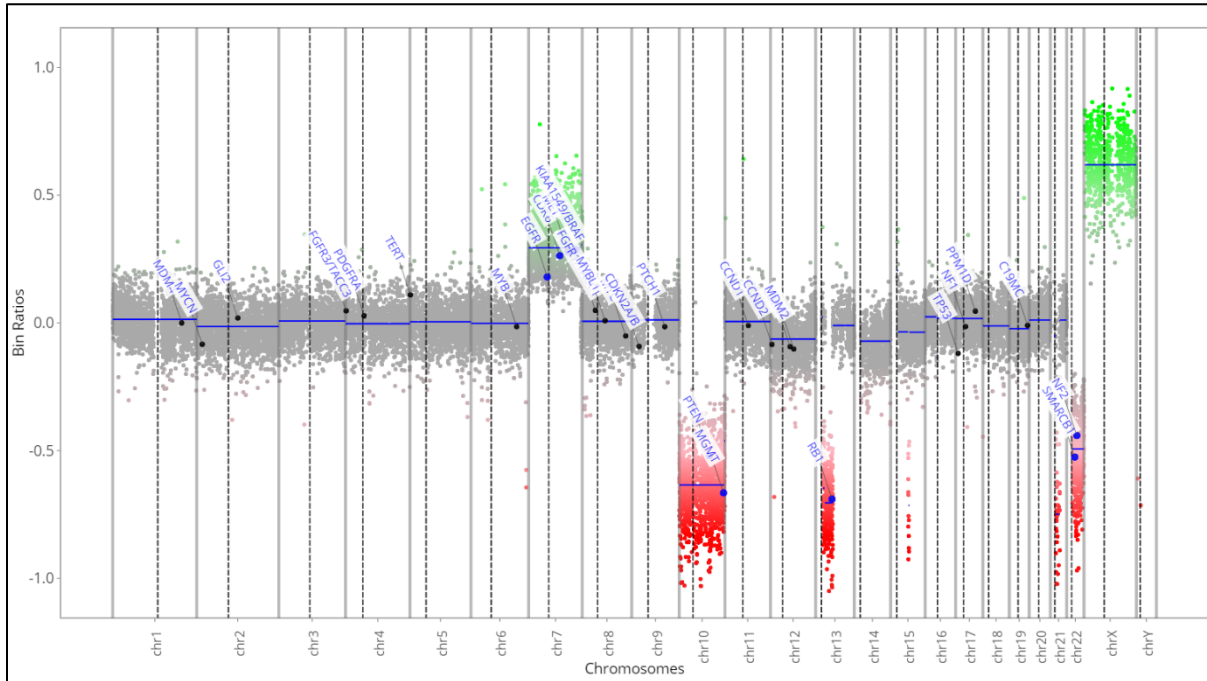

# QNS509

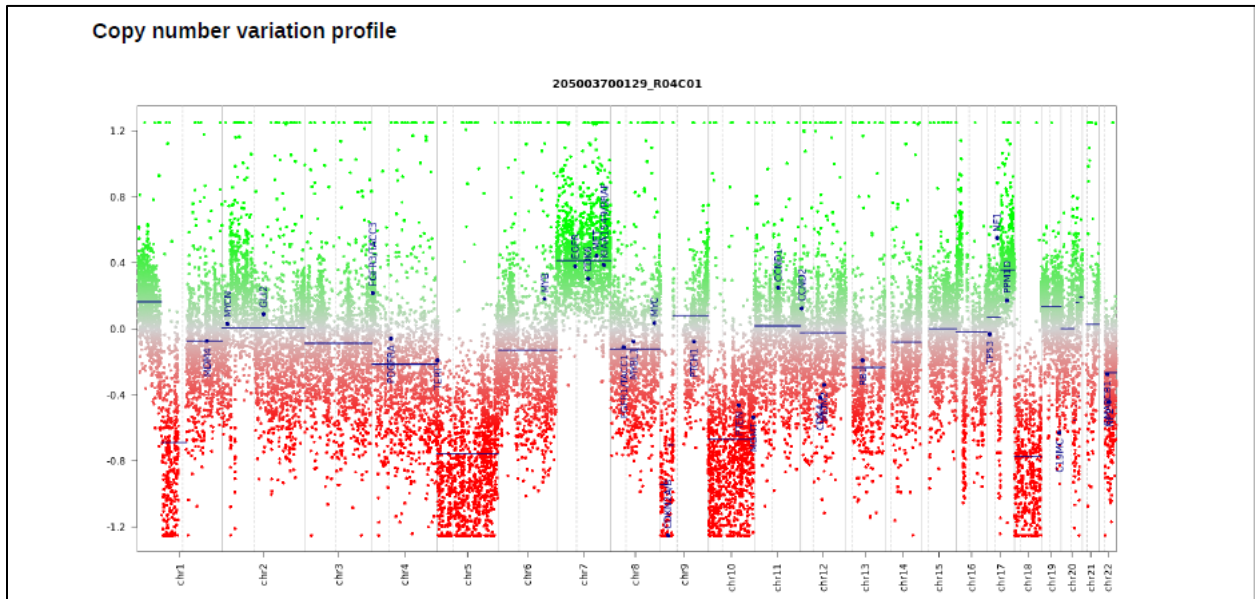

**Figure S2:** Chromosome copy number variation profiles for each characterized GBM tumor cell line. Gain of copy numbers are represented in green and loss of copy numbers are represented in red, all relative to the baseline at 0. All cell lines matched expected GBM CNV profiles.

**Figure S3: CD133+ Expression of GBM Tumor Cell Lines Compared to Isotype (IgG1 PE) Control**

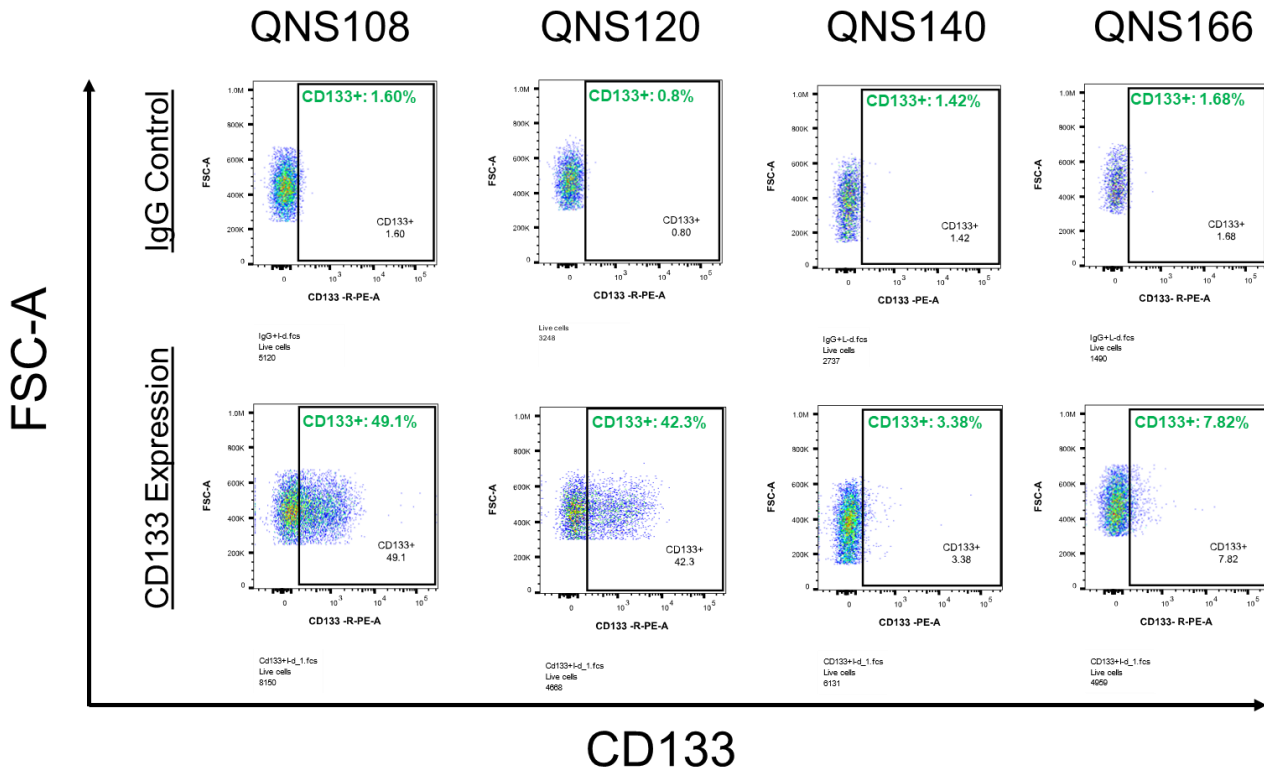

**Figure S3:** Expression of the stem marker CD133 by GBM tumor cell lines was compared to expression of IgG1 PE isotype control for validation of flow cytometry experiments.

Figure S4:

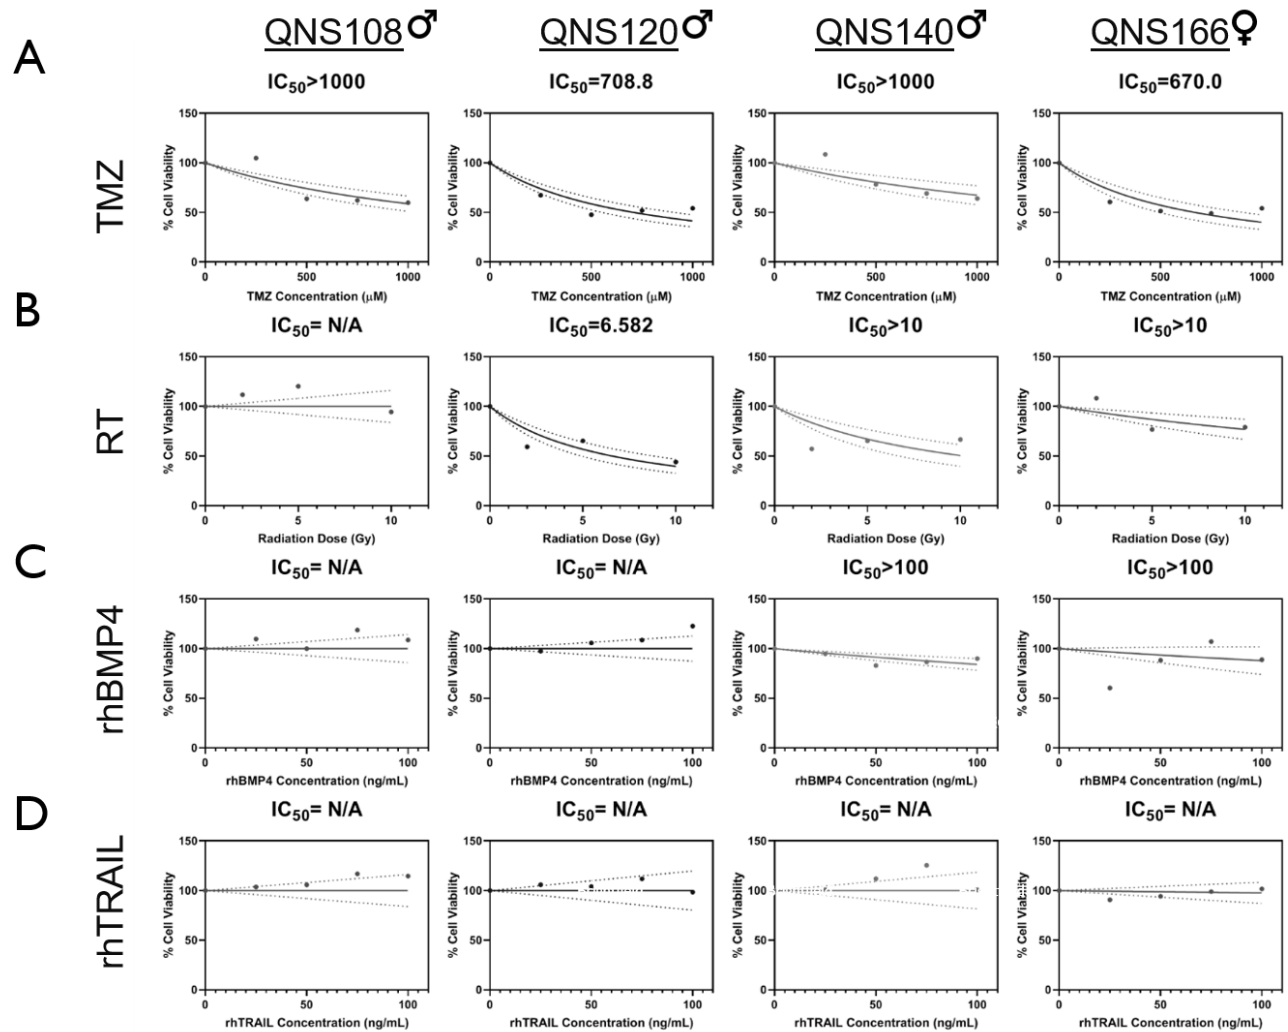

**Figure S4.** GBM tumor cells demonstrate varying sensitivity to different therapeutic strategies. **A)** Differential sensitivity to TMZ. **B)** Differential sensitivity to radiation therapy (RT). **C)** Differential sensitivity to recombinant human bone morphogenetic protein 4 (rhBMP4). **D)** Differential sensitivity to recombinant human TNF-related apoptosis-inducing ligand (rhTRAIL).

**Table S5. Summary of Functional Characteristics**

| Summary Table of Functional Characteristics                |           |           |            |            |        |         |
|------------------------------------------------------------|-----------|-----------|------------|------------|--------|---------|
| Functional Characteristics                                 | Cell Line |           |            |            |        |         |
|                                                            | QNS108    | QNS120    | QNS140     | QNS166     | QNS315 | QNS509  |
| <b>Sphere Count (# SFU)</b>                                | 180       | 62        | 17         | 35         | NA     | NA      |
| <b>Sphere Diameter (µm)</b>                                | 98.06 µm  | 71.86 µm  | 58.82 µm   | 74.87 µm   | NA     | NA      |
| <b>% CD133 Expression</b>                                  | 62.05%    | 22.74%    | 2.86%      | 12.72%     | NA     | NA      |
| <b>Mean # of Migrating Cells</b>                           | 2.22      | 66.36     | 0.8        | 13.78      | 15.07  | 1.07    |
| <b><i>in vitro</i> Growth Kinetics Doubling Time (hrs)</b> | 59.14 hrs | 83.92 hrs | 136.15 hrs | 115.78 hrs | N/A    | N/A     |
| <b><i>in vivo</i> Growth Slope for Male Mice (k)</b>       | 1.527     | 0.3139    | -0.005216  | -0.04773   | 0.8303 | 0.07183 |
| <b><i>in vivo</i> Growth Slope for Female Mice (k)</b>     | 1.616     | 0.3706    | -0.03789   | -0.04773   | 0.9541 | 0.09378 |

SFU = Sphere Forming Unit,



**Figure S5: Histology for QNS108 and QNS120**

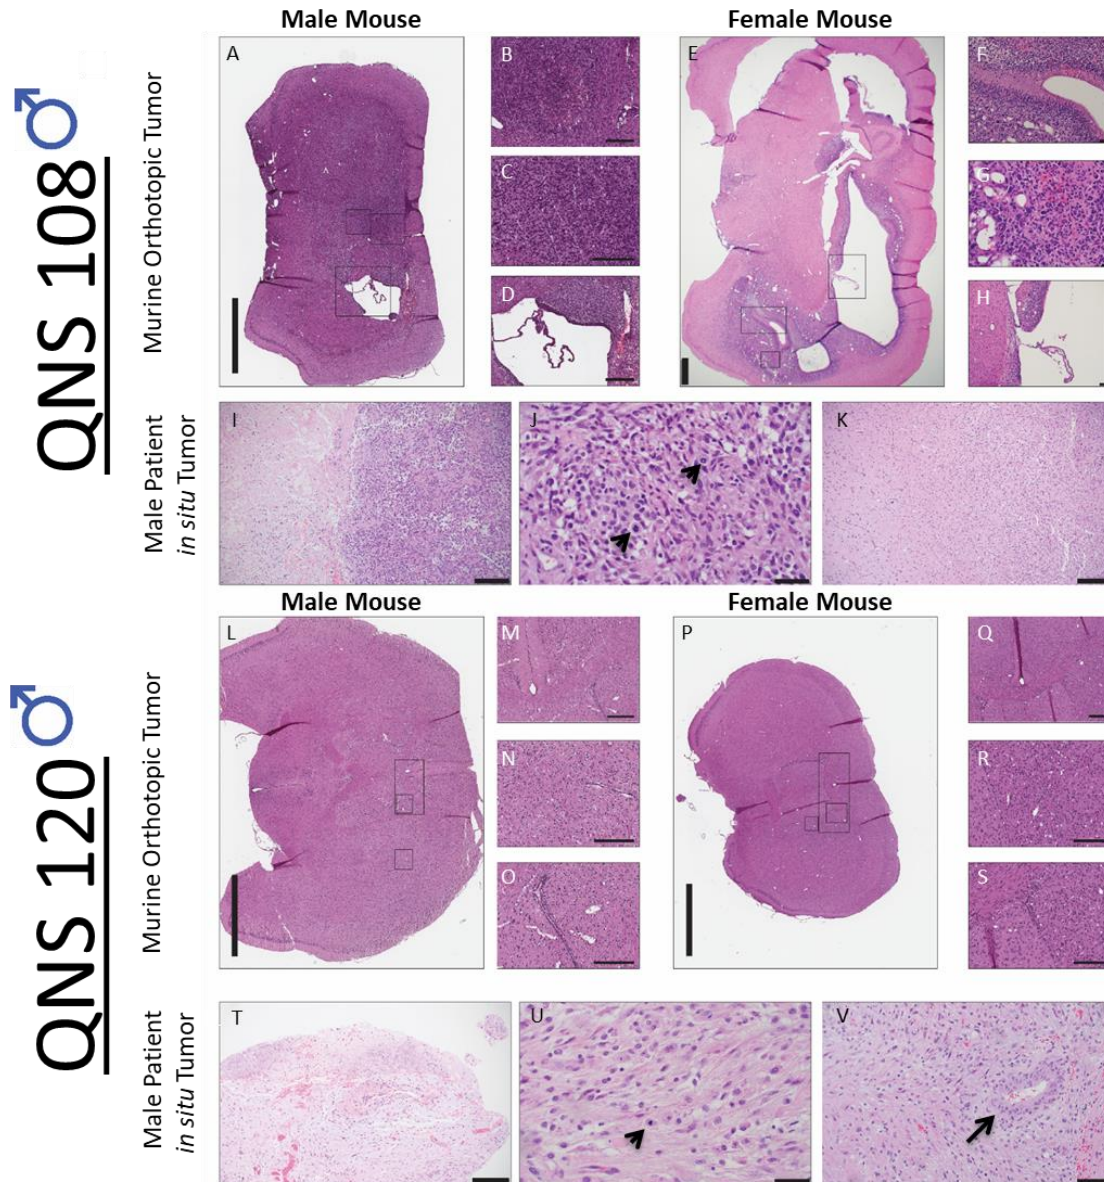

**Figure S5.** H&E stains of QNS108 and QNS120 BTIC orthotopic tumor models recapitulate patient GBM tumor features. **A-D)** Male murine QNS108 whole brain (**A**) with features of pseudopalisading necrosis (**B**), mitotic figures (**C**), and tumor cells proximal to ventricles (**D**), (scale bars: A=2 mm, B-C=200  $\mu$ m, D=300  $\mu$ m). **E-H)** Female murine QNS108 whole brain (**E**) with features of pseudopalisading necrosis (**F**), mitotic figures (**G**), and tumor cells proximal to ventricles (**H**), (scale bars: E-F=500  $\mu$ m, G=200  $\mu$ m, H=100  $\mu$ m). **I-K)** QNS108 *in situ* Patient tumor histology with evidence of necrosis (**I**), mitotic figures (indicated by arrows), (**J**), and invasion throughout the parenchyma (**K**), (scale bars: I-J =200 $\mu$ m, K=50 $\mu$ m). **L-O)** Male murine QNS120 whole brain (**L**) with features of migratory tumor cells (**M**), mitotic figures (**N**), and tumor cells proximal to ventricles (**O**), (scale bars: L=2 mm, M=300  $\mu$ m, N-O=200  $\mu$ m). **P-S)** Female murine QNS120 whole brain (**P**) with features of migratory tumor cells (**Q**), mitotic figures and hypercellularity (**R**), and tumor cells proximal to ventricles (**S**), (scale bars: P=2 mm, Q=300  $\mu$ m, R-S=200  $\mu$ m). **T-V)** QNS120 *in situ* Patient tumor histology with evidence of necrosis (**T**), mitotic figures (indicated by arrow), (**U**), and vascular proliferation (indicated by arrow), (**V**), (scale bars: T=200  $\mu$ m, U=50 $\mu$ m, V=100 $\mu$ m).

**Figure S6: QNS108 *in vivo* Expression of Human Nuclei, Proliferation, Stem Cell, and Astrocytic Markers**

# QNS 108 ♂

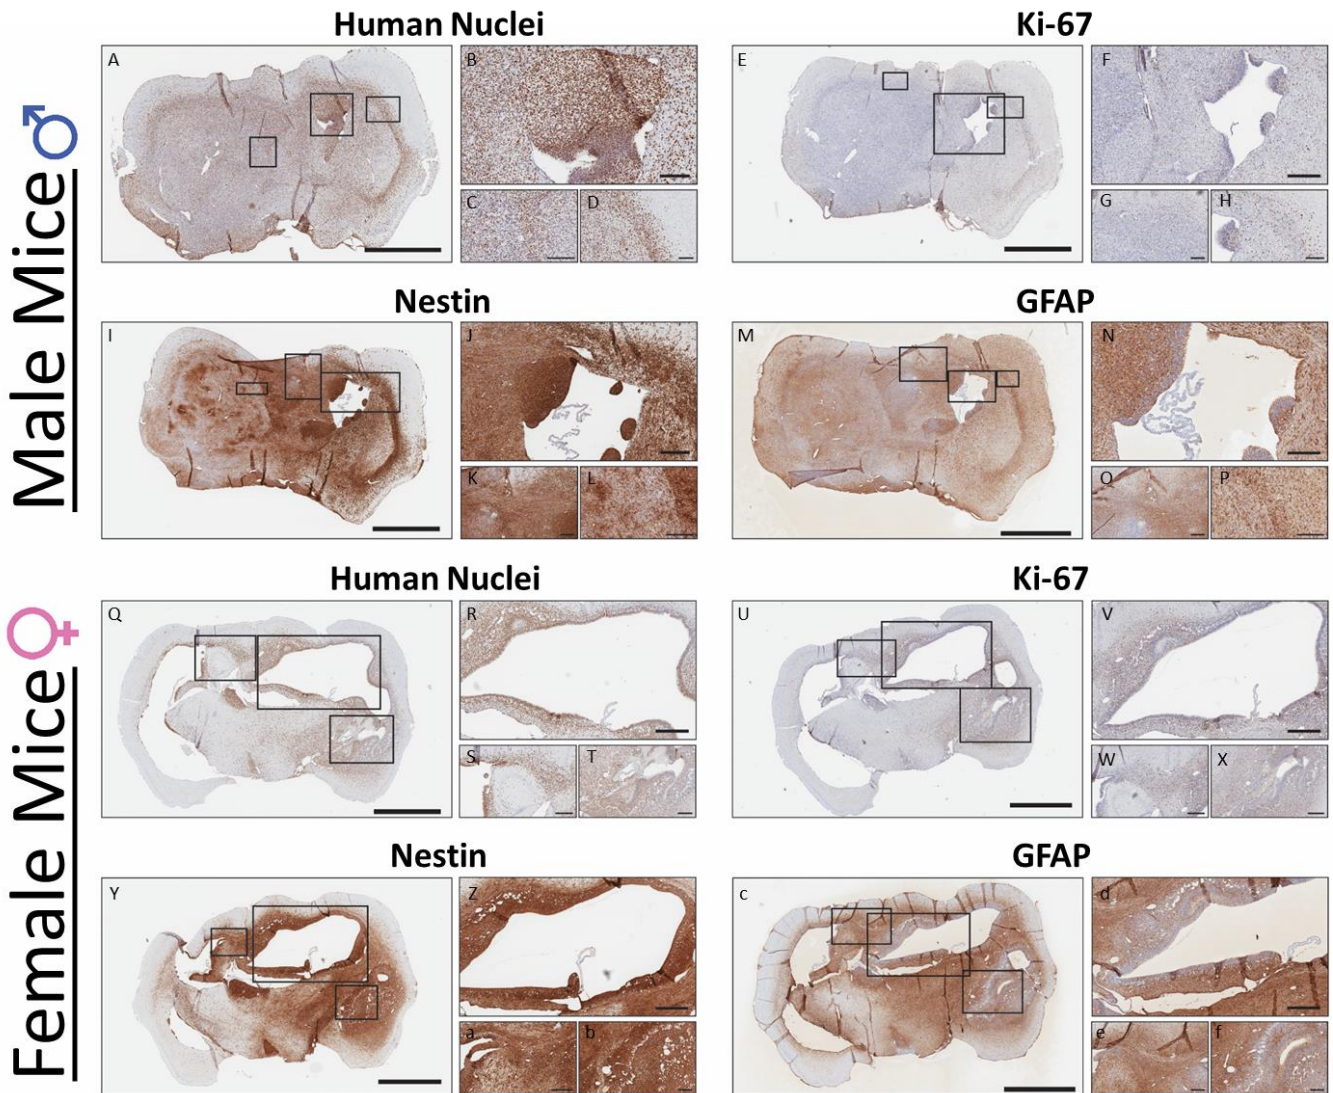

**Figure S6.** QNS108 BTIC orthotopic tumors implanted into male and female mice expressed stem cell, astrocytic, and proliferation markers. **A-D)** Expression of Human Nuclei in male murine brains (scale bars: A=2mm, B-D=200  $\mu$ m). **E-H)** Expression of Ki-67 in male murine brains (scale bars: E=2mm, F=400  $\mu$ m, G-H=200  $\mu$ m). **I-L)** Expression of Nestin in male murine brains (scale bars: I=2 mm, J=300  $\mu$ m, K-L=200  $\mu$ m). **M-P)** Expression of GFAP in male murine brains (scale bars: M=2 mm, N-P=200  $\mu$ m). **Q-T)** Expression of Human Nuclei in female murine brains (scale bars: Q=2 mm, R=500  $\mu$ m, S-T=300  $\mu$ m). **U-X)** Expression of Ki-67 in female murine brains (scale bars: U=2 mm, V=500  $\mu$ m, W=300  $\mu$ m, X=400  $\mu$ m). **Y-b)** Expression of Nestin in female murine brains (scale bars: Y=2 mm, Z=500  $\mu$ m, a-b=200  $\mu$ m). **c-f)** Expression of GFAP in female murine brains (scale bars: c=2 mm, d=400  $\mu$ m, e-f=200  $\mu$ m).



**Figure S7: QNS120 *in vivo* Expression of Human Nuclei, Proliferation, Stem Cell, and Astrocytic Markers**

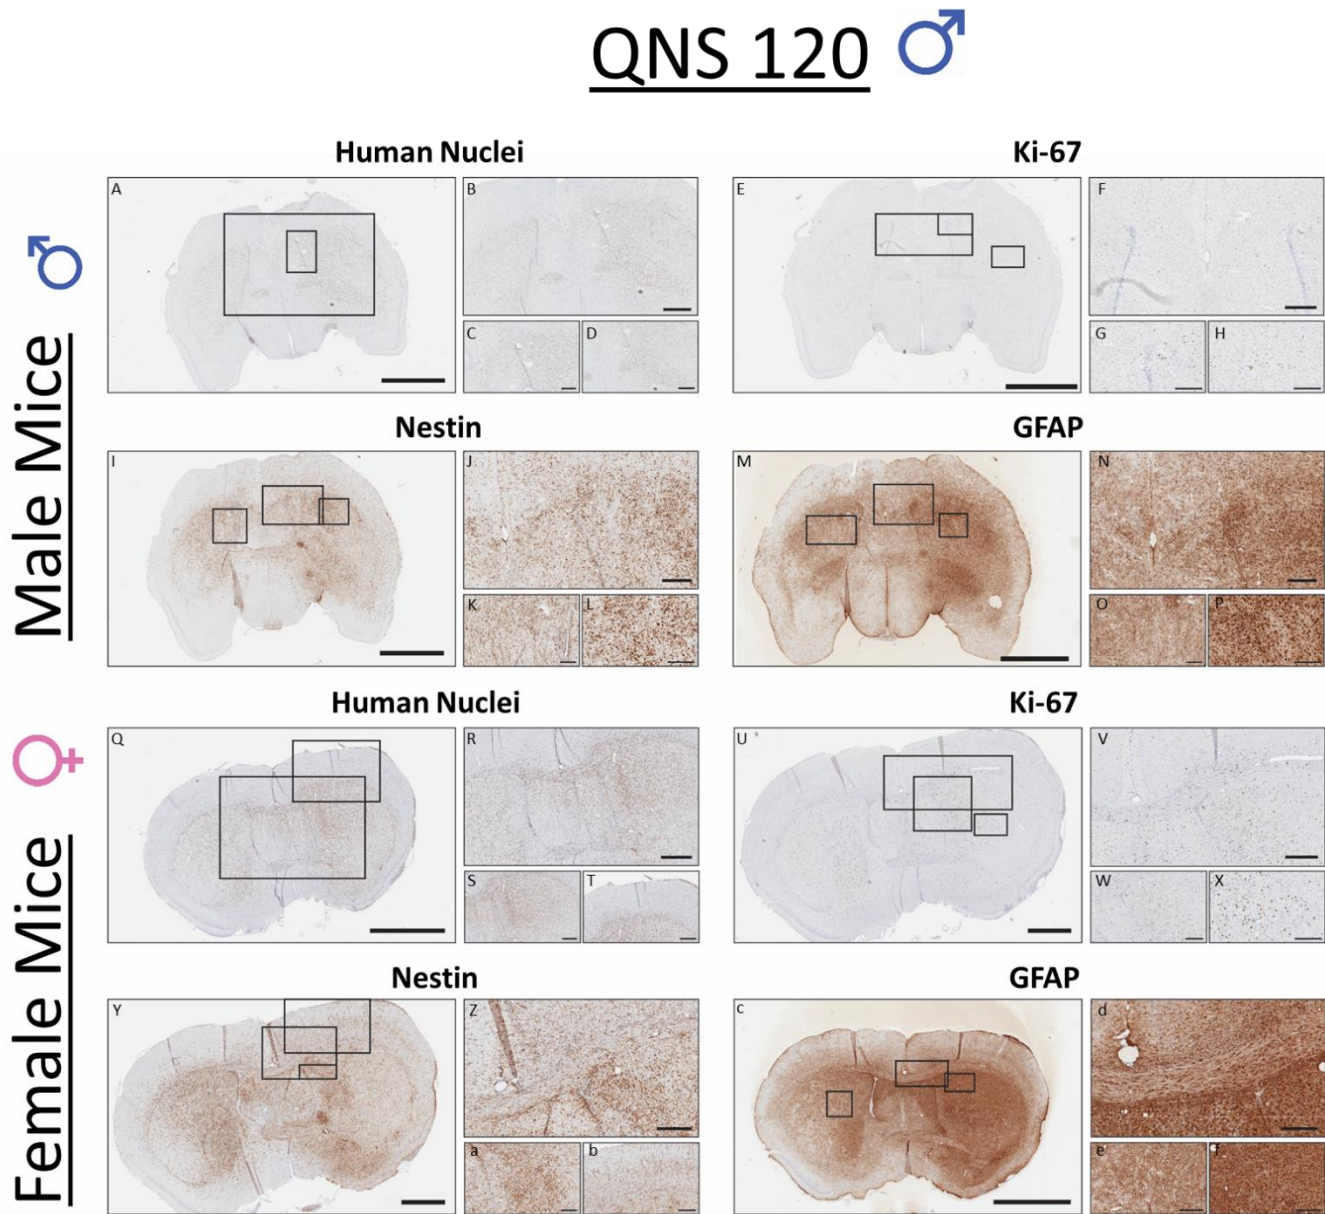

**Figure S7.** QNS120 BTIC orthotopic tumors implanted into male and female mice expressed stem cell, astrocytic, and proliferation markers. **A-D)** Expression of Human Nuclei in male murine brains (scale bars: A=2 mm, B= 700  $\mu$ m, C=300  $\mu$ m, D=500  $\mu$ m). **E-H)** Expression of Ki-67 in male murine brains (scale bars: E=2 mm, F= 300  $\mu$ m, G-H=200  $\mu$ m). **I-L)** Expression of Nestin in male murine brains (scale bars: I=2 mm, J=300  $\mu$ m, K=200  $\mu$ m, L=200  $\mu$ m). **M-P)** Expression of GFAP in male murine brains (scale bars: M=2 mm, N= 300  $\mu$ m, O-P=200  $\mu$ m). **Q-T)** Expression of Human Nuclei in female murine brains (scale bars: Q=2 mm, R=600  $\mu$ m, S=400  $\mu$ m, T=400  $\mu$ m). **U-X)** Expression of Ki-67 in female murine brains (scale bars: U=1 mm, V=400  $\mu$ m, W=300  $\mu$ m, X=200  $\mu$ m). **Y-b)** Expression of Nestin in female murine brains (scale bars: Y=1 mm, Z=300  $\mu$ m, a=200  $\mu$ m, b= 300  $\mu$ m). **c-f)** Expression of GFAP in female murine brains (scale bars: c=2 mm, d-f=200  $\mu$ m).

**Figure S8: Histology for QNS166 and QNS140**

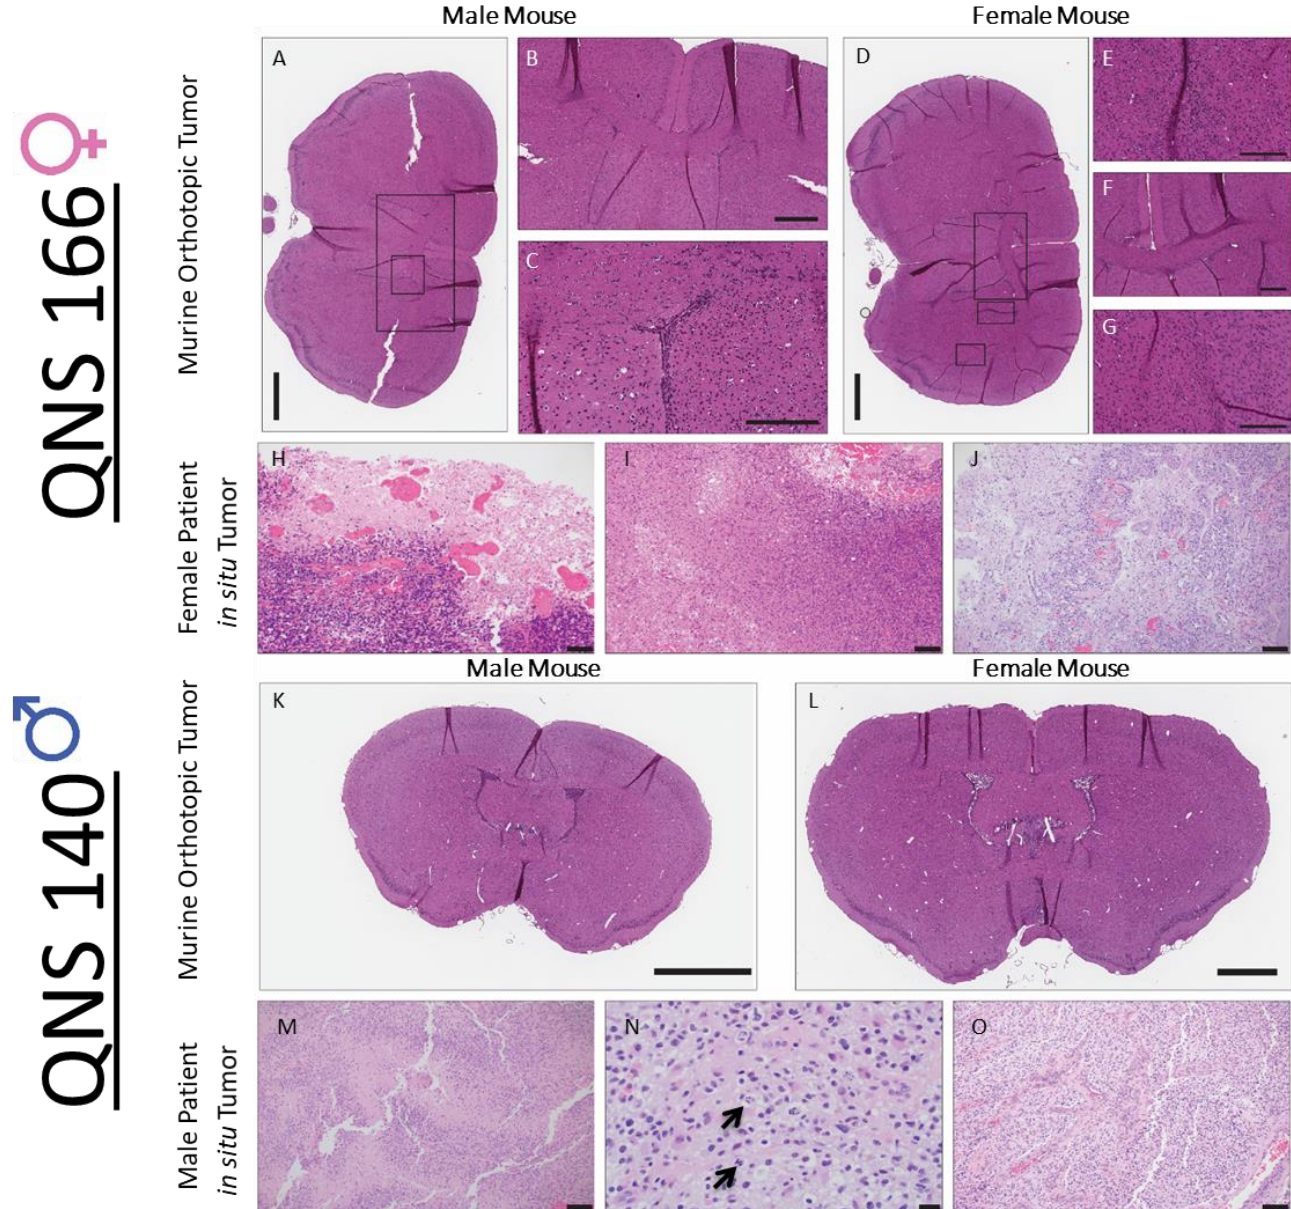

**Figure S8.** H&E stains of QNS140 and QNS 166 orthotopic murine tumors did not recapitulate patient tumor growth. **A-C**) Male murine QNS166 whole brain (**A**) with view of corpus callosum (**B**), and ventricle (**C**) where minimal tumor cells were observed (scale bars: A=900  $\mu$ m, B= 500  $\mu$ m, C=200  $\mu$ m). **D-G**) Female murine QNS166 whole brain (**D**) with view of tumor cell injection site (**E**), corpus callosum (**F**), and cluster of cells towards outer right hemisphere of brain (**G**), (scale bars: D=900  $\mu$ m, E=200  $\mu$ m, F=300  $\mu$ m, G=200  $\mu$ m). **H-J**) QNS166 patient *in situ* brain tumor histology with necrosis (**H**), invasion (**I**), and hypervascularity (**J**), (scale bars: H=50  $\mu$ m, I=100  $\mu$ m, J=100  $\mu$ m). **K**) Male murine QNS140 whole brain with no observed tumor growth (scale bar: K=2 mm). **L**) Female murine QNS140 whole brain with no observed tumor growth (scale bars: L=1 mm). **M-O**) QNS140 patient *in situ* brain tumor histology with necrosis (**M**), mitotic figures (indicated by arrows), (**N**), and hypervascularity (**O**), (scale bars: M=100  $\mu$ m, N=20  $\mu$ m, O=100  $\mu$ m).



**Figure S9: Histology for QNS315 and QNS509**

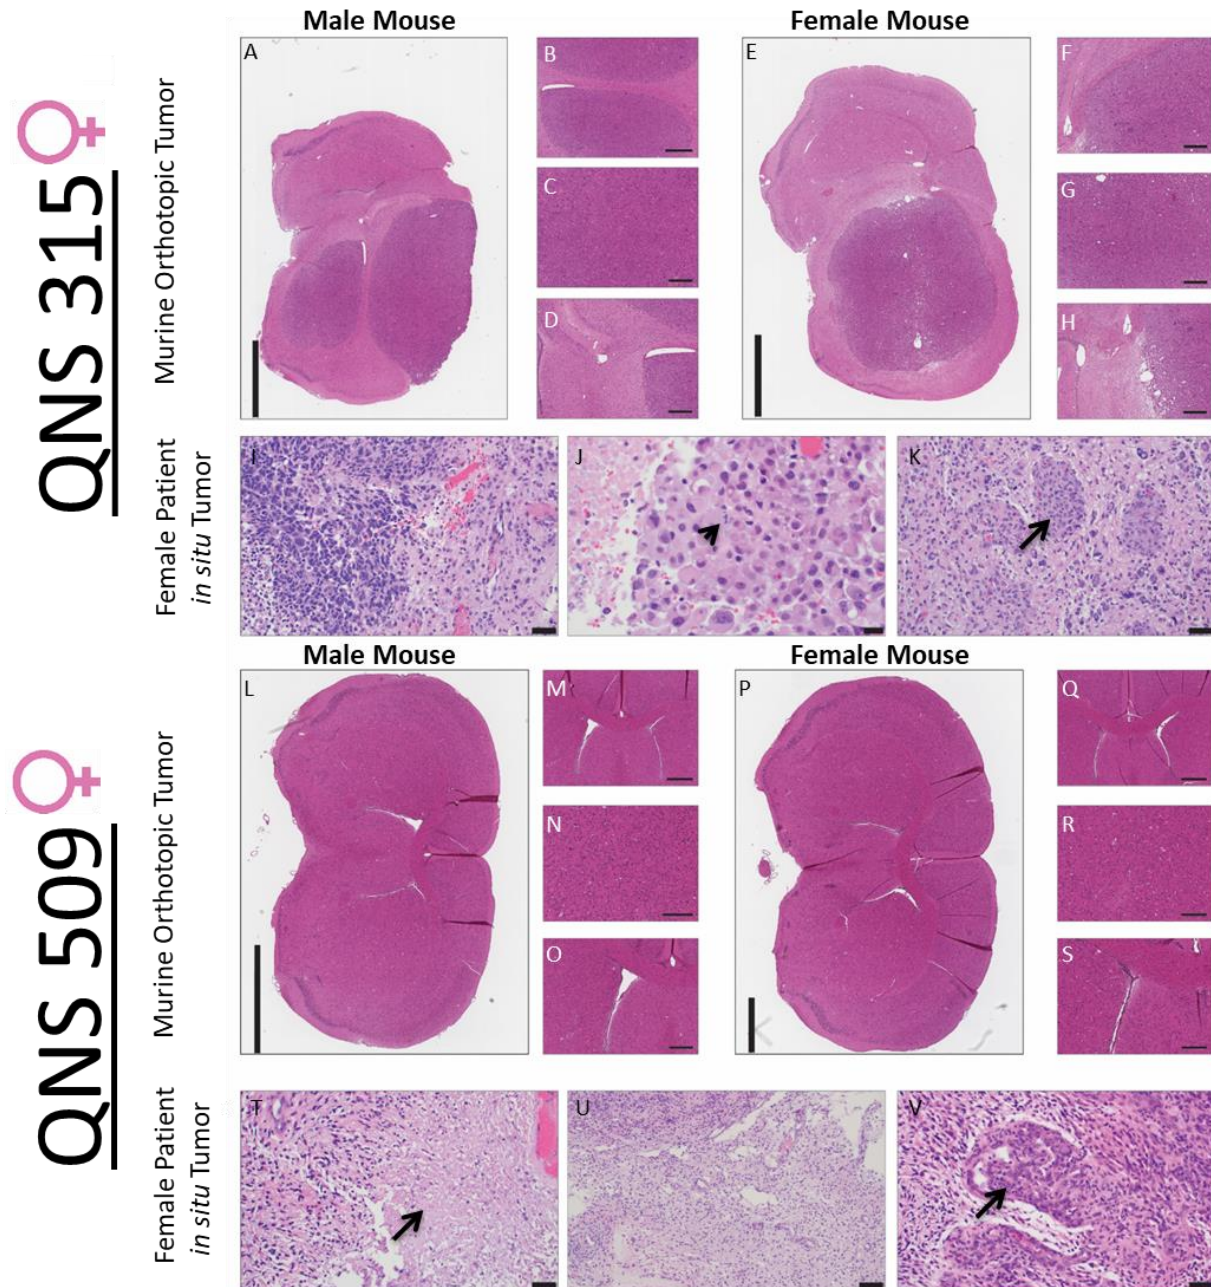

**Figure S9.** H&E stains of QNS315 and QNS509 orthotopic murine tumors and *in situ* patient histology. **A-D)** Male murine QNS315 whole brain (**A**) with views of corpus callosum (**B**), hypercellularity (**C**), and ventricles (**D**), (scale bars: A=2 mm, B=500  $\mu$ m, C-D=300  $\mu$ m). **E-H)** Female murine QNS315 whole brain (**E**) with views of corpus callosum (**F**), hypercellularity (**G**), and ventricles (**H**), (scale bars: E=2 mm, F-H=300  $\mu$ m.) **I-K)** QNS315 patient *in situ* histology with a primitive appearing component (**I**), presence of mitotic figures (**J**), and vascular proliferation (**K**), (scale bars: I=50  $\mu$ m, J=20  $\mu$ m, K=50  $\mu$ m). **L-O)** Male murine QNS509 whole brain (**L**) with views of corpus callosum (**M**), hypercellularity (**N**), and the ventricle (**O**), (scale bars: L=2 mm, M=500  $\mu$ m, N=200  $\mu$ m, O=300  $\mu$ m). **P-S)** Female murine QNS509 whole brain (**P**) with views of corpus callosum (**Q**), hypercellularity (**R**), and ventricle (**S**), (scale bars: P=1 mm, Q=500  $\mu$ m, R=200  $\mu$ m, S=200  $\mu$ m). **T-V)** QNS509 patient *in situ* histology with necrosis (**T**), tumor cell infiltration (**U**), and vascular proliferation (**V**), (scale bars: T= 50  $\mu$ m, U=100  $\mu$ m, V=50  $\mu$ m).
